# Supplementary material
Source: PubMed Central journal article supplement (PMC3870026)
Supplement: NIHMS502169-supplement-1.pdf [file NIHMS502169-supplement-1.pdf]

Supplementary Table 1: Composition of diets

| Formula (in g/kg)               | AIN93G  | Isorhamnetin | Myricetin | Quercetin | Rutin   |
|---------------------------------|---------|--------------|-----------|-----------|---------|
| Casein                          | 200.0   | 200.0        | 200.0     | 200.0     | 200.0   |
| L-Cystine                       | 3.0     | 3.0          | 3.0       | 3.0       | 3.0     |
| Corn Starch                     | 397.486 | 396.934      | 396.930   | 396.895   | 396.420 |
| Maltodextrin                    | 132.0   | 132.0        | 132.0     | 132.0     | 132.0   |
| Sucrose                         | 100.0   | 100.0        | 100.0     | 100.0     | 100.0   |
| Soybean Oil                     | 70.0    | 70.0         | 70.0      | 70.0      | 70.0    |
| Cellulose                       | 50.0    | 50.0         | 50.0      | 50.0      | 50.0    |
| Mineral Mix, AIN-93G-MX (94046) | 35.0    | 35.0         | 35.0      | 35.0      | 35.0    |
| Vitamin Mix, AIN-93-VX (94047)  | 10.0    | 10.0         | 10.0      | 10.0      | 10.0    |
| Choline Bitartrate              | 2.5     | 2.5          | 2.5       | 2.5       | 2.5     |
| TBHQ, antioxidant               | 0.014   | 0.014        | 0.014     | 0.014     | 0.014   |
| Isorhamnetin                    | 0       | 0.552        | 0         | 0         | 0       |
| Myricetin                       | 0       | 0            | 0.556     | 0         | 0       |
| Quercetin                       | 0       | 0            | 0         | 0.591     | 0       |
| Rutin                           | 0       | 0            | 0         | 0         | 1.066   |
