# Supplementary material
Source: PubMed Central journal article supplement (PMC3870026)
Supplement: NIHMS502169-supplement-2.pdf [file NIHMS502169-supplement-2.pdf]

**Supplementary TABLE 2.** Histological assessment of colonic inflammation (Colitis Score)

| Criteria                           | Degree of Inflammation  |            |         |
|------------------------------------|-------------------------|------------|---------|
|                                    | 1                       | 2          | 3       |
| Distribution of leukocytes         | Focal/locally extensive | Multifocal | Diffuse |
| Severity of infiltrate             | Mild                    | Moderate   | Severe  |
| Distribution of epithelial erosion | Focal/locally extensive | Multifocal | Diffuse |
| Severity of necrosis               | Mild                    | Moderate   | Severe  |
| AGH/Sq metaplasia                  | Focal/locally extensive | Multifocal | Diffuse |

A score of 0 was assigned for each criterion not represented in the section
